# Supplementary material for: Cis- and Trans-Acting Expression Quantitative Trait Loci of Long Non-Coding RNA in 2,549 Cancers With Potential Clinical and Therapeutic Implications
Source: Front Oncol. 2020 Oct 19;10:602104. doi: 10.3389/fonc.2020.602104 (PMC7604522; doi:10.3389/fonc.2020.602104)
Supplement: Supplementary file 8 [file Table_7.xls]

## Sheet: Sheet1
Supplementary Table S7. Significant regulatory axes at FDR < 0.1 and adjusted R2 > 0.1
lncrna	lncrna_chr	lncrna_start	lncrna_end	cytoband	snp	snp_chr	snp_pos	cancer	mrna	mrna_pos	beta	lncrna_p	instrument_p	Rsquare	adj_Rsquare	fdr	hgnc_symbol	tag_snp
ENSG00000196756.7	chr20	37049235	37063996	20q11.23	rs11476061	chr20	37108964	BRCA_P	CCDC158	chr4:77234155-77328476	-0.673609	0.000373994	1.31318e-20	0.106971	0.104996	0.0557762	SNHG17	rs11476061
ENSG00000223485.1	chr6	169558187	169563019	6q27	rs11968752	chr6	169626967	OV	NCAM2	chr21:22370633-22915650	1.75726	0.00017081	0.000102953	0.200617	0.19695	0.0380728	RP11-417E7.1	rs11968752
ENSG00000223485.1	chr6	169558187	169563019	6q27	rs11968752	chr6	169626967	OV	CORIN	chr4:47596015-47840123	1.47643	7.1958e-05	0.000102953	0.451385	0.448868	0.0165965	RP11-417E7.1	rs11968752
ENSG00000224810.1	chr1	182031812	182038388	1q25.3	rs368389649	chr1	182044943	BRCA_P	ZNF648	chr1:182023705-182030847	1.13161	3.43624e-05	3.84785e-05	0.619328	0.618492	0.00639004	RP11-538D16.2	rs368389649
ENSG00000224810.1	chr1	182031812	182038388	1q25.3	rs61816375	chr1	181902042	BRCA_P	ZNF648	chr1:182023705-182030847	1.64684	5.96231e-08	0.000273508	0.635893	0.635095	1.42599e-05	RP11-538D16.2	rs61816375
ENSG00000224810.1	chr1	182031812	182038388	1q25.3	rs35457311	chr1	181870588	BRCA_P	ZNF648	chr1:182023705-182030847	1.54493	1.04459e-07	0.00018184	0.647601	0.646827	2.44296e-05	RP11-538D16.2	rs35457311
ENSG00000224810.1	chr1	182031812	182038388	1q25.3	rs112635953	chr1	181836618	BRCA_P	ZNF648	chr1:182023705-182030847	1.53	9.23749e-08	0.000146396	0.648153	0.647382	2.17238e-05	RP11-538D16.2	rs112635953
ENSG00000224810.1	chr1	182031812	182038388	1q25.3	rs114863511	chr1	182031965	BRCA_P	ZNF648	chr1:182023705-182030847	1.16947	2.42544e-06	6.35366e-06	0.625519	0.624694	0.000518406	RP11-538D16.2	rs114863511
ENSG00000224810.1	chr1	182031812	182038388	1q25.3	rs72637265	chr1	181829644	BRCA_P	ZNF648	chr1:182023705-182030847	1.52739	2.61772e-08	6.65838e-05	0.647351	0.646569	6.35067e-06	RP11-538D16.2	rs72637265
ENSG00000224810.1	chr1	182031812	182038388	1q25.3	rs147095214	chr1	181871118	BRCA_P	ZNF648	chr1:182023705-182030847	1.54716	3.63738e-08	0.000105468	0.647459	0.646684	8.77398e-06	RP11-538D16.2	rs147095214
ENSG00000224810.1	chr1	182031812	182038388	1q25.3	rs116298502	chr1	181834757	BRCA_P	ZNF648	chr1:182023705-182030847	1.55738	5.09358e-08	0.000135133	0.646457	0.645682	1.22168e-05	RP11-538D16.2	rs116298502
ENSG00000225174.1	chr6	108444719	108480596	6q21	rs4245535	chr6	108449212	KIRC	NR2E1	chr6:108487262-108510013	2.72286	3.13302e-06	0.000266466	0.3656	0.363031	0.0400895	OSTM1-AS1	rs4245535
ENSG00000226824.2	chr7	66119525	66134842	7q11.21	rs34163828	chr7	66055028	LIHC	PACSIN1	chr6:34433838-34503008	-1.4387	3.8973e-05	1.08085e-12	0.140106	0.131837	0.0949973	RP4-756H11.3	rs34163828
ENSG00000228701.1	chr10	93542596	93558048	10q23.32	rs10649398	chr10	93574851	OV	ASTL	chr2:96789589-96804175	0.695029	0.000232357	3.52873e-21	0.111108	0.107226	0.0499881	TNKS2-AS1	rs10649398
ENSG00000228701.1	chr10	93542596	93558048	10q23.32	rs112177544	chr10	93611176	OV	HFM1	chr1:91726323-91870426	0.677867	0.000255897	6.39416e-21	0.109794	0.105907	0.0536361	TNKS2-AS1	rs112177544
ENSG00000228701.1	chr10	93542596	93558048	10q23.32	rs10649398	chr10	93574851	OV	HFM1	chr1:91726323-91870426	0.676873	0.000242031	3.52873e-21	0.109879	0.105992	0.0514517	TNKS2-AS1	rs10649398
ENSG00000228701.1	chr10	93542596	93558048	10q23.32	rs112177544	chr10	93611176	OV	ASTL	chr2:96789589-96804175	0.70989	0.000187761	6.39416e-21	0.109814	0.105927	0.0413878	TNKS2-AS1	rs112177544
ENSG00000228701.1	chr10	93542596	93558048	10q23.32	rs113806423	chr10	93607336	OV	HFM1	chr1:91726323-91870426	0.677867	0.000255897	6.39416e-21	0.109794	0.105907	0.0536361	TNKS2-AS1	rs113806423
ENSG00000228701.1	chr10	93542596	93558048	10q23.32	rs11394924	chr10	93601721	OV	ASTL	chr2:96789589-96804175	0.70989	0.000187761	6.39416e-21	0.109814	0.105927	0.0413878	TNKS2-AS1	rs11394924
ENSG00000228701.1	chr10	93542596	93558048	10q23.32	rs11394924	chr10	93601721	OV	HFM1	chr1:91726323-91870426	0.677867	0.000255897	6.39416e-21	0.109794	0.105907	0.0536361	TNKS2-AS1	rs11394924
ENSG00000228701.1	chr10	93542596	93558048	10q23.32	rs11421323	chr10	93599092	OV	ASTL	chr2:96789589-96804175	0.68846	0.000330242	1.57806e-20	0.104875	0.100932	0.0661991	TNKS2-AS1	rs11421323
ENSG00000228701.1	chr10	93542596	93558048	10q23.32	rs11421323	chr10	93599092	OV	HFM1	chr1:91726323-91870426	0.715893	0.000120656	1.57806e-20	0.116624	0.112733	0.0271982	TNKS2-AS1	rs11421323
ENSG00000228701.1	chr10	93542596	93558048	10q23.32	rs144902429	chr10	93566348	OV	ASTL	chr2:96789589-96804175	0.695029	0.000232357	3.52873e-21	0.111108	0.107226	0.0499881	TNKS2-AS1	rs144902429
ENSG00000228701.1	chr10	93542596	93558048	10q23.32	rs144902429	chr10	93566348	OV	HFM1	chr1:91726323-91870426	0.676873	0.000242031	3.52873e-21	0.109879	0.105992	0.0514517	TNKS2-AS1	rs144902429
ENSG00000228701.1	chr10	93542596	93558048	10q23.32	rs199568060	chr10	93449360	OV	HFM1	chr1:91726323-91870426	0.6964	0.000488406	8.4549e-18	0.104885	0.10096	0.0947253	TNKS2-AS1	rs199568060
ENSG00000228701.1	chr10	93542596	93558048	10q23.32	rs113328802	chr10	93575243	OV	ASTL	chr2:96789589-96804175	0.695029	0.000232357	3.52873e-21	0.111108	0.107226	0.0499881	TNKS2-AS1	rs113328802
ENSG00000228701.1	chr10	93542596	93558048	10q23.32	rs113328802	chr10	93575243	OV	HFM1	chr1:91726323-91870426	0.676873	0.000242031	3.52873e-21	0.109879	0.105992	0.0514517	TNKS2-AS1	rs113328802
ENSG00000228701.1	chr10	93542596	93558048	10q23.32	rs113806423	chr10	93607336	OV	ASTL	chr2:96789589-96804175	0.70989	0.000187761	6.39416e-21	0.109814	0.105927	0.0413878	TNKS2-AS1	rs113806423
ENSG00000229056.2	chr2	197124748	197128928	2q32.3	rs71410609	chr2	197137617	OV	PLN	chr6:118869461-118881893	1.77453	0.000207471	0.000502846	0.328439	0.325455	0.0452318	AC020571.3	rs71410609
ENSG00000229645.4	chr14	95873606	95876427	14q32.2	rs61982639	chr14	96735325	BRCA_P	PI16	chr6:36916039-36932613	2.01559	0.000712482	4.04206e-05	0.287577	0.285932	0.0956312	LINC00341	rs61982639
ENSG00000229645.4	chr14	95873606	95876427	14q32.2	rs61982639	chr14	96735325	BRCA_P	SCARA5	chr8:27727399-27850244	1.88197	0.000190114	4.04206e-05	0.289674	0.288033	0.0313488	LINC00341	rs61982639
ENSG00000229645.4	chr14	95873606	95876427	14q32.2	rs61982639	chr14	96735325	BRCA_P	SLC19A3	chr2:228550571-228582728	1.84938	0.000395017	4.04206e-05	0.27242	0.27074	0.0583037	LINC00341	rs61982639
ENSG00000229645.4	chr14	95873606	95876427	14q32.2	rs61982639	chr14	96735325	BRCA_P	LEP	chr7:127881337-127897681	2.1577	0.000406541	4.04206e-05	0.260067	0.258358	0.0595879	LINC00341	rs61982639
ENSG00000230812.1	chr1	59486059	59510286	1p32.1	rs35463473	chr1	59486604	BRCA_P	TIFAB	chr5:134779908-134788089	0.835939	0.000222132	5.55248e-08	0.249932	0.248284	0.0360648	RP4-794H19.4	rs35463473
ENSG00000230812.1	chr1	59486059	59510286	1p32.1	rs35463473	chr1	59486604	BRCA_P	ZBED2	chr3:111311747-111314290	0.888012	0.000290957	5.55248e-08	0.307483	0.305961	0.04434	RP4-794H19.4	rs35463473
ENSG00000230812.1	chr1	59486059	59510286	1p32.1	rs1408954	chr1	59486190	BRCA_P	TIFAB	chr5:134779908-134788089	0.817747	0.00036158	8.99849e-08	0.256618	0.254991	0.0541254	RP4-794H19.4	rs1408954
ENSG00000230812.1	chr1	59486059	59510286	1p32.1	rs1408954	chr1	59486190	BRCA_P	ZBED2	chr3:111311747-111314290	0.869982	0.000465961	8.99849e-08	0.310652	0.309143	0.0669035	RP4-794H19.4	rs1408954
ENSG00000231057.3	chr1	211849104	211863445	1q32.3	rs10710484	chr1	211837404	LUAD	VWA3A	chr16:22103863-22168287	1.96201	8.57317e-05	2.21672e-05	0.226993	0.223464	0.0999162	RP11-122M14.1	rs10710484
ENSG00000231057.3	chr1	211849104	211863445	1q32.3	rs10710484	chr1	211837404	LUAD	ZBBX	chr3:166958075-167098089	1.7465	3.2314e-05	2.21672e-05	0.450983	0.448476	0.0451926	RP11-122M14.1	rs10710484
ENSG00000231764.4	chr7	96584453	96643377	7q21.3	rs113918352	chr7	96803318	PRAD	DLX6	chr7:96634860-96640351	1.38767	1.7232e-07	0.000282546	0.732028	0.73106	0.00119008	DLX6-AS1	rs113918352
ENSG00000231764.4	chr7	96584453	96643377	7q21.3	rs3757492	chr7	96656684	PRAD	DLX6	chr7:96634860-96640351	1.38482	1.92466e-06	0.000970267	0.731939	0.730971	0.0111367	DLX6-AS1	rs3757492
ENSG00000231768.1	chr1	234663637	234667525	1q42.2	rs199770829	chr1	234667976	BRCA_P	SCARA5	chr8:27727399-27850244	1.83923	0.000262395	7.41118e-06	0.154798	0.152482	0.0403515	RP5-855F14.1	rs199770829
ENSG00000231768.1	chr1	234663637	234667525	1q42.2	rs199770829	chr1	234667976	BRCA_P	SYN2	chr3:12045876-12232900	1.34803	0.000359999	7.41118e-06	0.246892	0.244829	0.0539845	RP5-855F14.1	rs199770829
ENSG00000231768.1	chr1	234663637	234667525	1q42.2	rs199770829	chr1	234667976	BRCA_P	TRPM6	chr9:77337411-77503010	1.31893	0.000115852	7.41118e-06	0.114623	0.112198	0.020084	RP5-855F14.1	rs199770829
ENSG00000231768.1	chr1	234663637	234667525	1q42.2	rs11415543	chr1	234685911	BRCA_P	SCARA5	chr8:27727399-27850244	1.69961	0.000680636	1.08007e-05	0.128138	0.126027	0.0922366	RP5-855F14.1	rs11415543
ENSG00000231768.1	chr1	234663637	234667525	1q42.2	rs34160151	chr1	234665436	BRCA_P	SCARA5	chr8:27727399-27850244	1.65721	0.000744013	1.60688e-05	0.21804	0.2162	0.0992888	RP5-855F14.1	rs34160151
ENSG00000231768.1	chr1	234663637	234667525	1q42.2	rs199770829	chr1	234667976	BRCA_P	RELN	chr7:103112231-103629963	1.74991	0.000161783	7.41118e-06	0.168043	0.165764	0.0273174	RP5-855F14.1	rs199770829
ENSG00000231768.1	chr1	234663637	234667525	1q42.2	rs199770829	chr1	234667976	BRCA_P	HIF3A	chr19:46800303-46846690	1.22513	0.000286637	7.41118e-06	0.166492	0.164209	0.0437607	RP5-855F14.1	rs199770829
ENSG00000233101.6	chr17	46626992	46683776	17q21.32	rs4262989	chr17	46849352	LUAD	HOXB8	chr17:46689708-46692301	2.43131	1.11024e-06	5.41861e-05	0.513568	0.511567	0.00319678	HOXB-AS3	rs4262989
ENSG00000233101.6	chr17	46626992	46683776	17q21.32	rs4262989	chr17	46849352	LUAD	HOXB9	chr17:46698521-46703718	3.2136	2.02547e-05	5.41861e-05	0.336869	0.33414	0.0339915	HOXB-AS3	rs4262989
ENSG00000233429.5	chr7	27135266	27139884	7p15.2	rs5883060	chr7	27147125	BRCA_P	CXCL1	chr4:74735121-74736959	0.843519	0.000690041	1.07211e-10	0.179807	0.177992	0.0932119	HOTAIRM1	rs5883060
ENSG00000233429.5	chr7	27135266	27139884	7p15.2	rs5883063	chr7	27181145	BRCA_P	CXCL1	chr4:74735121-74736959	0.909166	0.000310172	1.85578e-10	0.177046	0.175209	0.0470981	HOTAIRM1	rs5883063
ENSG00000233429.5	chr7	27135266	27139884	7p15.2	rs3840582	chr7	27152398	LIHC	DPEP1	chr16:89679716-89704864	2.08114	1.62265e-05	1.7984e-06	0.306182	0.299931	0.0647221	HOTAIRM1	rs3840582
ENSG00000233429.5	chr7	27135266	27139884	7p15.2	rs146508208	chr7	27145151	LIHC	DPEP1	chr16:89679716-89704864	2.0711	2.97734e-05	4.38346e-06	0.309668	0.303276	0.0934542	HOTAIRM1	rs146508208
ENSG00000233429.5	chr7	27135266	27139884	7p15.2	rs78922934	chr7	27145548	LIHC	DPEP1	chr16:89679716-89704864	2.0711	2.97734e-05	4.38346e-06	0.309668	0.303276	0.0934542	HOTAIRM1	rs78922934
ENSG00000235576.1	chr2	7865932	7870836	2p25.2	rs34631313	chr2	6946193	OV	PYHIN1	chr1:158901342-158946844	1.54296	3.42416e-06	0.000392522	0.585754	0.583929	0.000821468	AC092580.4	rs34631313
ENSG00000235576.1	chr2	7865932	7870836	2p25.2	rs34631313	chr2	6946193	OV	TRAT1	chr3:108541545-108573852	1.42054	2.00293e-05	0.000392522	0.544905	0.5429	0.00471052	AC092580.4	rs34631313
ENSG00000235576.1	chr2	7865932	7870836	2p25.2	rs34631313	chr2	6946193	OV	FASLG	chr1:172628158-172636014	1.53561	4.98876e-09	0.000392522	0.697686	0.696354	1.21142e-06	AC092580.4	rs34631313
ENSG00000235576.1	chr2	7865932	7870836	2p25.2	rs34631313	chr2	6946193	OV	GZMM	chr19:544034-549924	1.19559	5.95007e-06	0.000392522	0.644081	0.642513	0.00142173	AC092580.4	rs34631313
ENSG00000236924.1	chr9	6645956	6670635	9p24.1	rs141742614	chr9	6661511	PRAD	GLDC	chr9:6532464-6645650	3.54435	6.10836e-21	2.58112e-09	0.351172	0.348854	1.30776e-16	RP11-390F4.6	rs141742614
ENSG00000236924.1	chr9	6645956	6670635	9p24.1	rs200788444	chr9	6661797	PRAD	GLDC	chr9:6532464-6645650	3.54435	6.10836e-21	2.58112e-09	0.351172	0.348854	1.30776e-16	RP11-390F4.6	rs200788444
ENSG00000236924.1	chr9	6645956	6670635	9p24.1	rs142542905	chr9	6660198	PRAD	GLDC	chr9:6532464-6645650	2.97971	9.68658e-19	8.17305e-08	0.574842	0.573302	1.8853e-14	RP11-390F4.6	rs142542905
ENSG00000236924.1	chr9	6645956	6670635	9p24.1	rs144422540	chr9	6717682	PRAD	GLDC	chr9:6532464-6645650	3.72184	5.72373e-07	0.00254894	0.245646	0.242962	0.00360415	RP11-390F4.6	rs144422540
ENSG00000236924.1	chr9	6645956	6670635	9p24.1	rs10975720	chr9	6661328	PRAD	GLDC	chr9:6532464-6645650	3.31139	5.82729e-11	9.03748e-05	0.435431	0.433371	5.42427e-07	RP11-390F4.6	rs10975720
ENSG00000236924.1	chr9	6645956	6670635	9p24.1	rs60328654	chr9	6679766	PRAD	GLDC	chr9:6532464-6645650	2.62957	1.3862e-09	0.000237361	0.630127	0.62881	1.23656e-05	RP11-390F4.6	rs60328654
ENSG00000236924.1	chr9	6645956	6670635	9p24.1	rs62566000	chr9	6657616	PRAD	GLDC	chr9:6532464-6645650	3.54435	6.10836e-21	2.58112e-09	0.351172	0.348854	1.30776e-16	RP11-390F4.6	rs62566000
ENSG00000236924.1	chr9	6645956	6670635	9p24.1	rs71330104	chr9	6659784	PRAD	GLDC	chr9:6532464-6645650	2.97407	1.70982e-18	1.12824e-07	0.579796	0.578279	3.0505e-14	RP11-390F4.6	rs71330104
ENSG00000236924.1	chr9	6645956	6670635	9p24.1	rs199785834	chr9	6661522	PRAD	GLDC	chr9:6532464-6645650	3.54435	6.10836e-21	2.58112e-09	0.351172	0.348854	1.30776e-16	RP11-390F4.6	rs199785834
ENSG00000236924.1	chr9	6645956	6670635	9p24.1	rs71330111	chr9	6671571	PRAD	GLDC	chr9:6532464-6645650	2.89944	7.594e-13	2.18046e-05	0.620012	0.618442	7.74201e-09	RP11-390F4.6	rs71330111
ENSG00000236924.1	chr9	6645956	6670635	9p24.1	rs71330118	chr9	6693155	PRAD	GLDC	chr9:6532464-6645650	3.66098	5.67939e-13	6.95568e-06	0.267306	0.26468	6.07958e-09	RP11-390F4.6	rs71330118
ENSG00000236924.1	chr9	6645956	6670635	9p24.1	rs75872693	chr9	6658761	PRAD	GLDC	chr9:6532464-6645650	3.54435	6.10836e-21	2.58112e-09	0.351172	0.348854	1.30776e-16	RP11-390F4.6	rs75872693
ENSG00000236924.1	chr9	6645956	6670635	9p24.1	rs71330108	chr9	6661368	PRAD	GLDC	chr9:6532464-6645650	3.54435	6.10836e-21	2.58112e-09	0.351172	0.348854	1.30776e-16	RP11-390F4.6	rs71330108
ENSG00000236924.1	chr9	6645956	6670635	9p24.1	rs34395590	chr9	6675663	PRAD	GLDC	chr9:6532464-6645650	2.9175	3.06896e-13	1.05187e-05	0.570817	0.569268	3.65024e-09	RP11-390F4.6	rs34395590
ENSG00000236924.1	chr9	6645956	6670635	9p24.1	rs34650269	chr9	6662590	PRAD	GLDC	chr9:6532464-6645650	3.54435	6.10836e-21	2.58112e-09	0.351172	0.348854	1.30776e-16	RP11-390F4.6	rs34650269
ENSG00000236924.1	chr9	6645956	6670635	9p24.1	rs5001001	chr9	6585868	THCA	GLDC	chr9:6532464-6645650	3.91078	3.08699e-07	0.00101096	0.225053	0.22205	0.010189	RP11-390F4.6	rs5001001
ENSG00000236924.1	chr9	6645956	6670635	9p24.1	rs33974832	chr9	6658515	PRAD	GLDC	chr9:6532464-6645650	3.20608	9.24224e-17	5.89204e-07	0.507761	0.505984	1.31913e-12	RP11-390F4.6	rs33974832
ENSG00000236924.1	chr9	6645956	6670635	9p24.1	rs59118286	chr9	6652633	PRAD	GLDC	chr9:6532464-6645650	3.85434	8.23821e-08	0.0010125	0.173209	0.170266	0.000587914	RP11-390F4.6	rs59118286
ENSG00000236924.1	chr9	6645956	6670635	9p24.1	rs57829573	chr9	6675477	PRAD	GLDC	chr9:6532464-6645650	2.68827	1.85804e-09	0.000298424	0.619107	0.617752	1.59117e-05	RP11-390F4.6	rs57829573
ENSG00000237975.2	chr1	152140601	152339163	1q21.3	rs5777794	chr1	151948892	BRCA_P	FLG	chr1:152274651-152297679	1.57923	5.08399e-05	0.000468341	0.244019	0.242365	0.00933088	FLG-AS1	rs5777794
ENSG00000237975.2	chr1	152140601	152339163	1q21.3	rs4353095	chr1	152401695	BRCA_P	FLG	chr1:152274651-152297679	1.69896	1.24663e-10	2.42025e-08	0.169851	0.167947	3.26856e-08	FLG-AS1	rs4353095
ENSG00000237975.2	chr1	152140601	152339163	1q21.3	rs4845743	chr1	152184149	BRCA_P	FLG	chr1:152274651-152297679	1.39142	6.53605e-23	1.37721e-23	0.324654	0.323177	2.49689e-20	FLG-AS1	rs4845743
ENSG00000237975.2	chr1	152140601	152339163	1q21.3	rs79717008	chr1	152167054	BRCA_P	FLG	chr1:152274651-152297679	1.3785	6.30723e-09	3.88768e-08	0.329616	0.328119	1.57078e-06	FLG-AS1	rs79717008
ENSG00000237975.2	chr1	152140601	152339163	1q21.3	rs939594	chr1	151783597	BRCA_P	FLG	chr1:152274651-152297679	1.23467	0.000750953	0.00110643	0.407781	0.406417	0.0997308	FLG-AS1	rs12073999
ENSG00000237975.2	chr1	152140601	152339163	1q21.3	rs113369647	chr1	152021845	BRCA_P	FLG	chr1:152274651-152297679	1.60116	1.58874e-06	3.52551e-05	0.240906	0.239219	0.000343047	FLG-AS1	rs113369647
ENSG00000237975.2	chr1	152140601	152339163	1q21.3	rs11338554	chr1	151940738	BRCA_P	FLG	chr1:152274651-152297679	1.57923	5.08399e-05	0.000468341	0.244019	0.242365	0.00933088	FLG-AS1	rs11338554
ENSG00000237975.2	chr1	152140601	152339163	1q21.3	rs11435688	chr1	151954033	BRCA_P	FLG	chr1:152274651-152297679	1.56737	2.29177e-05	0.000238192	0.249987	0.248346	0.00431886	FLG-AS1	rs11435688
ENSG00000237975.2	chr1	152140601	152339163	1q21.3	rs11459749	chr1	151965357	BRCA_P	FLG	chr1:152274651-152297679	1.52617	2.14307e-05	0.000185408	0.2698	0.268203	0.00404767	FLG-AS1	rs11459749
ENSG00000237975.2	chr1	152140601	152339163	1q21.3	rs144043341	chr1	152228720	BRCA_P	FLG	chr1:152274651-152297679	1.05583	1.8038e-05	5.78208e-07	0.395045	0.393645	0.00342991	FLG-AS1	rs144043341
ENSG00000237975.2	chr1	152140601	152339163	1q21.3	rs146830974	chr1	152238688	BRCA_P	FLG	chr1:152274651-152297679	1.05583	1.8038e-05	5.78208e-07	0.395045	0.393645	0.00342991	FLG-AS1	rs146830974
ENSG00000237975.2	chr1	152140601	152339163	1q21.3	rs150461488	chr1	152236681	BRCA_P	FLG	chr1:152274651-152297679	1.05583	1.8038e-05	5.78208e-07	0.395045	0.393645	0.00342991	FLG-AS1	rs150461488
ENSG00000237975.2	chr1	152140601	152339163	1q21.3	rs151144742	chr1	152445288	BRCA_P	FLG	chr1:152274651-152297679	1.16517	4.93322e-06	1.10974e-06	0.383664	0.38231	0.000994014	FLG-AS1	rs151144742
ENSG00000237975.2	chr1	152140601	152339163	1q21.3	rs66527911	chr1	152162133	BRCA_P	FLG	chr1:152274651-152297679	0.881607	1.91186e-07	8.77681e-14	0.389724	0.388373	4.37427e-05	FLG-AS1	rs66527911
ENSG00000237975.2	chr1	152140601	152339163	1q21.3	rs6659606	chr1	152436382	BRCA_P	FLG	chr1:152274651-152297679	1.30067	5.07832e-06	1.05478e-05	0.343666	0.341288	0.00102082	FLG-AS1	rs6659606
ENSG00000237975.2	chr1	152140601	152339163	1q21.3	rs10788823	chr1	152161648	BRCA_P	FLG	chr1:152274651-152297679	1.08937	1.00354e-05	5.2521e-07	0.389161	0.387747	0.00196123	FLG-AS1	rs10788823
ENSG00000237975.2	chr1	152140601	152339163	1q21.3	rs34806697	chr1	152281621	BRCA_P	FLG	chr1:152274651-152297679	0.903825	0.000126771	6.06348e-08	0.383352	0.381948	0.0217536	FLG-AS1	rs34806697
ENSG00000237975.2	chr1	152140601	152339163	1q21.3	rs35135981	chr1	152005327	BRCA_P	FLG	chr1:152274651-152297679	1.10197	0.000135963	2.17245e-05	0.390956	0.389624	0.0230962	FLG-AS1	rs35135981
ENSG00000237975.2	chr1	152140601	152339163	1q21.3	rs36003376	chr1	151946629	BRCA_P	FLG	chr1:152274651-152297679	1.57923	5.08399e-05	0.000468341	0.244019	0.242365	0.00933088	FLG-AS1	rs36003376
ENSG00000237975.2	chr1	152140601	152339163	1q21.3	rs36016127	chr1	152440064	BRCA_P	FLG	chr1:152274651-152297679	1.1363	1.51013e-05	2.50284e-06	0.386768	0.385426	0.00289759	FLG-AS1	rs36016127
ENSG00000237975.2	chr1	152140601	152339163	1q21.3	rs2932588	chr1	151960325	BRCA_P	FLG	chr1:152274651-152297679	1.52617	2.14307e-05	0.000185408	0.2698	0.268203	0.00404767	FLG-AS1	rs2932588
ENSG00000237975.2	chr1	152140601	152339163	1q21.3	rs3007681	chr1	152019357	BRCA_N	FLG	chr1:152274651-152297679	1.82648	4.56444e-09	2.26686e-06	0.552538	0.547674	0.000105366	FLG-AS1	rs3007681
ENSG00000237975.2	chr1	152140601	152339163	1q21.3	rs3007681	chr1	152019357	BRCA_P	FLG	chr1:152274651-152297679	1.51203	5.50408e-07	7.50106e-06	0.280995	0.27939	0.000122286	FLG-AS1	rs3007681
ENSG00000237975.2	chr1	152140601	152339163	1q21.3	rs3041084	chr1	152210492	BRCA_P	FLG	chr1:152274651-152297679	0.863393	1.11094e-06	5.23306e-13	0.38069	0.379311	0.000242356	FLG-AS1	rs3041084
ENSG00000237975.2	chr1	152140601	152339163	1q21.3	rs34564827	chr1	152170252	BRCA_P	FLG	chr1:152274651-152297679	0.875079	2.61257e-07	1.04567e-13	0.38953	0.388183	5.94526e-05	FLG-AS1	rs34564827
ENSG00000237975.2	chr1	152140601	152339163	1q21.3	rs199713158	chr1	152200602	BRCA_P	FLG	chr1:152274651-152297679	1.41506	3.95769e-09	3.73646e-08	0.312325	0.310783	9.91489e-07	FLG-AS1	rs199713158
ENSG00000238121.1	chr13	30914407	30951282	13q12.3	rs9546285	chr13	31947325	KIRC	TNIP3	chr4:122052563-122148621	1.84684	1.28123e-07	5.57128e-05	0.267315	0.2643	0.0021119	LINC00426	rs9546285
ENSG00000238121.1	chr13	30914407	30951282	13q12.3	rs9546285	chr13	31947325	KIRC	ZBED2	chr3:111311747-111314290	1.97764	6.51189e-08	5.57128e-05	0.332763	0.330017	0.00119035	LINC00426	rs9546285
ENSG00000238121.1	chr13	30914407	30951282	13q12.3	rs9546285	chr13	31947325	KIRC	IFNG	chr12:68548548-68553527	1.58129	1.77587e-07	5.57128e-05	0.486992	0.484881	0.00267337	LINC00426	rs9546285
ENSG00000238121.1	chr13	30914407	30951282	13q12.3	rs9546285	chr13	31947325	KIRC	DTHD1	chr4:36283244-36346407	1.20127	6.47434e-06	5.57128e-05	0.457209	0.454975	0.075313	LINC00426	rs9546285
ENSG00000241657.1	chr7	142197570	142198069	7q34	rs6945212	chr7	142109728	OV	FASLG	chr1:172628158-172636014	1.05111	0.000482283	8.84623e-06	0.317612	0.311351	0.0938426	TRBV11-2	rs6945212
ENSG00000241657.1	chr7	142197570	142198069	7q34	rs6945212	chr7	142109728	OV	GZMM	chr19:544034-549924	1.11287	0.000291896	8.84623e-06	0.299492	0.293065	0.0605441	TRBV11-2	rs6945212
ENSG00000241657.1	chr7	142197570	142198069	7q34	rs6945212	chr7	142109728	OV	PYHIN1	chr1:158901342-158946844	1.2862	2.02248e-05	8.84623e-06	0.468696	0.463822	0.00473785	TRBV11-2	rs6945212
ENSG00000241657.1	chr7	142197570	142198069	7q34	rs6945212	chr7	142109728	OV	KLRB1	chr12:9747147-9760482	1.28228	0.000306841	8.84623e-06	0.327044	0.320871	0.0629878	TRBV11-2	rs6945212
ENSG00000241657.1	chr7	142197570	142198069	7q34	rs6945212	chr7	142109728	OV	TRAT1	chr3:108541545-108573852	1.20137	3.59999e-05	8.84623e-06	0.483275	0.478534	0.00836766	TRBV11-2	rs6945212
ENSG00000241657.1	chr7	142197570	142198069	7q34	rs6945212	chr7	142109728	OV	TNFRSF17	chr16:12058964-12061925	1.31819	0.000232635	8.84623e-06	0.390959	0.385371	0.0499881	TRBV11-2	rs6945212
ENSG00000245498.2	chr11	124670346	124704383	11q24.2	rs55792300	chr11	124676641	THCA	PTPRQ	chr12:80838126-81072802	1.17194	2.554e-06	4.65521e-16	0.167264	0.164756	0.0615826	RP11-677M14.7	rs55792300
ENSG00000245498.2	chr11	124670346	124704383	11q24.2	rs55792300	chr11	124676641	THCA	IVL	chr1:152881021-152884362	-1.75569	5.01213e-06	4.65521e-16	0.122649	0.120007	0.097487	RP11-677M14.7	rs55792300
ENSG00000245498.2	chr11	124670346	124704383	11q24.2	rs55792300	chr11	124676641	THCA	TMEM92	chr17:48348767-48358846	-1.71133	2.5072e-06	4.65521e-16	0.123884	0.121245	0.0615826	RP11-677M14.7	rs55792300
ENSG00000249001.1	chr4	88489187	88655108	4q22.1	rs6841293	chr4	88593622	LUAD	IBSP	chr4:88720733-88733587	2.20763	1.72746e-05	0.000199444	0.354108	0.351493	0.030199	RP11-742B18.1	rs6841293
ENSG00000254988.1	chr11	76666461	76689663	11q13.5	rs201520457	chr11	76680677	PRAD	B3GNT6	chr11:76745442-76753020	2.53675	8.38202e-06	0.000352177	0.635289	0.633982	0.0412687	CTD-2547H18.1	rs201520457
ENSG00000254988.1	chr11	76666461	76689663	11q13.5	rs34167975	chr11	76518705	PRAD	B3GNT6	chr11:76745442-76753020	3.2815	1.21892e-08	0.000162058	0.588034	0.586553	9.66527e-05	CTD-2547H18.1	rs34167975
ENSG00000254988.1	chr11	76666461	76689663	11q13.5	rs199836941	chr11	76678686	PRAD	B3GNT6	chr11:76745442-76753020	2.48795	1.42792e-05	0.00038833	0.634199	0.632879	0.0650314	CTD-2547H18.1	rs199836941
ENSG00000254988.1	chr11	76666461	76689663	11q13.5	rs7106466	chr11	76523524	PRAD	B3GNT6	chr11:76745442-76753020	3.22428	4.33464e-11	5.69483e-06	0.592838	0.591352	4.21826e-07	CTD-2547H18.1	rs7106466
ENSG00000255026.1	chr11	287305	288987	11p15.5	rs59861558	chr11	601428	LIHC	NLRP6	chr11:278365-285359	1.87409	3.66976e-05	1.2036e-05	0.356692	0.347231	0.0949072	RP11-326C3.2	rs59861558
ENSG00000258498.2	chr14	102018558	102026768	14q32.31	rs71116825	chr14	101809343	BRCA_P	DIO3	chr14:102027688-102029789	1.67821	2.36651e-05	0.00298454	0.544437	0.543337	0.0044399	DIO3OS	rs71116825
ENSG00000259084.2	chr14	96129593	96158967	14q32.13	rs11848549	chr14	95263046	KIRC	TCL6	chr14:96116838-96146170	2.90158	1.41817e-08	0.00972945	0.786722	0.785187	0.000279179	RP11-1070N10.6	rs11848549
ENSG00000259084.2	chr14	96129593	96158967	14q32.13	rs55643249	chr14	96115713	KIRC	TCL6	chr14:96116838-96146170	2.78143	3.18671e-19	7.2764e-05	0.824033	0.823309	2.03883e-14	RP11-1070N10.6	rs55643249
ENSG00000259457.1	chr15	69857063	69858129	15q23	rs1077109	chr15	69959937	LUAD	CALCA	chr11:14988214-14993900	3.31362	7.19141e-05	1.24191e-05	0.416391	0.413638	0.088003	RP11-279F6.2	rs1077109
ENSG00000259457.1	chr15	69857063	69858129	15q23	rs1077109	chr15	69959937	LUAD	ASCL1	chr12:103351464-103354294	3.27358	1.70575e-05	1.24191e-05	0.388841	0.385958	0.030199	RP11-279F6.2	rs1077109
ENSG00000259807.1	chr16	29228491	29231352	16p11.2	rs11357624	chr16	28629363	LUAD	OR51E1	chr11:4664650-4676718	1.57755	2.89879e-05	8.14187e-06	0.104986	0.101178	0.0425181	RP11-426C22.4	rs11357624
ENSG00000259807.1	chr16	29228491	29231352	16p11.2	rs35681318	chr16	28501781	LUAD	APCDD1L	chr20:57034157-57089994	1.98702	7.11422e-06	6.72862e-06	0.160369	0.156827	0.0165826	RP11-426C22.4	rs35681318
ENSG00000259807.1	chr16	29228491	29231352	16p11.2	rs143299878	chr16	28617930	LUAD	APCDD1L	chr20:57034157-57089994	1.79092	2.95331e-05	9.80308e-06	0.237699	0.234371	0.0425181	RP11-426C22.4	rs143299878
ENSG00000259807.1	chr16	29228491	29231352	16p11.2	rs3020804	chr16	28618636	LUAD	APCDD1L	chr20:57034157-57089994	1.66137	2.32435e-05	2.75e-06	0.274115	0.270959	0.0355545	RP11-426C22.4	rs62036658
ENSG00000259807.1	chr16	29228491	29231352	16p11.2	rs113113152	chr16	28515908	LUAD	APCDD1L	chr20:57034157-57089994	1.87719	3.6259e-05	4.14519e-05	0.249689	0.246278	0.0493011	RP11-426C22.4	rs113113152
ENSG00000259807.1	chr16	29228491	29231352	16p11.2	rs375054850	chr16	28618968	LUAD	APCDD1L	chr20:57034157-57089994	1.74258	2.15273e-05	4.506e-06	0.250173	0.246912	0.0339915	RP11-426C22.4	rs375054850
ENSG00000259807.1	chr16	29228491	29231352	16p11.2	rs41278164	chr16	28617308	LUAD	APCDD1L	chr20:57034157-57089994	1.77688	1.5107e-05	3.83265e-06	0.241575	0.238263	0.0284412	RP11-426C22.4	rs41278164
ENSG00000260655.1	chr22	42318027	42319104	22q13.2	rs9611692	chr22	42327498	BRCA_P	VPREB3	chr22:24094930-24096655	1.03793	0.000113167	0.000161619	0.449607	0.448312	0.0196994	CTA-250D10.23	rs9611692
ENSG00000260655.1	chr22	42318027	42319104	22q13.2	rs9611692	chr22	42327498	BRCA_P	CD19	chr16:28943260-28950667	1.23049	0.000706986	0.000161619	0.44438	0.443073	0.0950445	CTA-250D10.23	rs9611692
ENSG00000260655.1	chr22	42318027	42319104	22q13.2	rs9611692	chr22	42327498	BRCA_P	BLK	chr8:11351510-11422113	1.28749	0.000117847	0.000161619	0.458565	0.457291	0.0203881	CTA-250D10.23	rs9611692
ENSG00000260816.1	chr16	78931062	78933541	16q23.1	rs4888920	chr16	79115931	KIRC	FOXA1	chr14:38059189-38064239	2.05976	6.11982e-06	1.26437e-06	0.138416	0.134955	0.074579	RP11-319G9.3	rs4888920
ENSG00000261105.1	chr13	76178836	76210130	13q22.2	rs57738506	chr13	76202091	BRCA_P	CYP27C1	chr2:127941696-127977654	0.521319	0.000714811	1.9149e-16	0.170979	0.169047	0.0957915	RP11-173B14.5	rs57738506
ENSG00000261327.3	chr16	88210904	88219696	16q24.2	rs11117310	chr16	87961531	OV	DIO2	chr14:80663870-80697397	1.84868	0.000192519	0.00122467	0.57991	0.577841	0.0422806	RP11-863P13.3	rs11117310
ENSG00000261327.3	chr16	88210904	88219696	16q24.2	rs7499048	chr16	87951243	OV	CORIN	chr4:47596015-47840123	1.95435	0.000312379	0.00856147	0.477799	0.474992	0.0639051	RP11-863P13.3	rs7499048
ENSG00000261327.3	chr16	88210904	88219696	16q24.2	rs5818653	chr16	87959827	OV	DIO2	chr14:80663870-80697397	1.90281	0.000147311	0.00112252	0.564835	0.562802	0.0329579	RP11-863P13.3	rs5818653
ENSG00000261327.3	chr16	88210904	88219696	16q24.2	rs5818653	chr16	87959827	OV	NTM	chr11:131240373-132206716	1.8342	0.000338494	0.00112252	0.629754	0.628024	0.0676263	RP11-863P13.3	rs5818653
ENSG00000261327.3	chr16	88210904	88219696	16q24.2	rs7499048	chr16	87951243	OV	NKX3-2	chr4:13542454-13546674	2.09829	0.0004631	0.00856147	0.475156	0.472335	0.0909992	RP11-863P13.3	rs7499048
ENSG00000261327.3	chr16	88210904	88219696	16q24.2	rs5818653	chr16	87959827	OV	MMP13	chr11:102813724-102826463	2.4334	0.000446159	0.00112252	0.561852	0.559804	0.0882508	RP11-863P13.3	rs5818653
ENSG00000263050.1	chr17	1946769	1948262	17p13.3	rs59440108	chr17	2357857	LIHC	PLEKHB1	chr11:73357223-73373864	2.06878	2.98199e-05	2.1227e-07	0.117839	0.107211	0.0934542	RP11-667K14.3	rs59440108
ENSG00000263753.2	chr18	5232875	5246507	18p11.31	rs148453324	chr18	5244932	PRAD	CCR4	chr3:32993066-32997841	1.03958	1.45801e-05	1.86484e-09	0.218113	0.215321	0.0650314	LINC00667	rs148453324
ENSG00000263753.2	chr18	5232875	5246507	18p11.31	rs10623198	chr18	5249691	PRAD	CCR4	chr3:32993066-32997841	1.09088	5.43972e-06	1.2359e-09	0.204366	0.201535	0.028405	LINC00667	rs10623198
ENSG00000263753.2	chr18	5232875	5246507	18p11.31	rs57347371	chr18	5221322	PRAD	CCR4	chr3:32993066-32997841	1.04709	1.04148e-05	1.13811e-09	0.215182	0.212389	0.0484725	LINC00667	rs57347371
ENSG00000263753.2	chr18	5232875	5246507	18p11.31	rs3216104	chr18	5293759	PRAD	CCR4	chr3:32993066-32997841	1.16934	8.48146e-06	2.14975e-08	0.181011	0.178096	0.0412687	LINC00667	rs3216104
ENSG00000263753.2	chr18	5232875	5246507	18p11.31	rs34161954	chr18	5204762	PRAD	CCR4	chr3:32993066-32997841	1.30635	7.05851e-06	2.05627e-07	0.107343	0.104061	0.0359804	LINC00667	rs34161954
ENSG00000263753.2	chr18	5232875	5246507	18p11.31	rs34932830	chr18	5248580	PRAD	CCR4	chr3:32993066-32997841	1.06404	9.96739e-06	1.76807e-09	0.211328	0.208512	0.0474211	LINC00667	rs34932830
ENSG00000267308.1	chr19	15937855	15946663	19p13.12	rs139298172	chr19	15954074	BRCA_P	UCA1	chr19:15939771-15947130	1.88016	7.02526e-15	3.7964e-06	0.681623	0.68091	2.0523e-12	AC004510.3	rs139298172
ENSG00000267308.1	chr19	15937855	15946663	19p13.12	rs57488663	chr19	15952471	BRCA_P	UCA1	chr19:15939771-15947130	2.02602	2.34448e-55	6.94045e-27	0.645713	0.644916	3.88108e-52	AC004510.3	rs57488663
ENSG00000267308.1	chr19	15937855	15946663	19p13.12	rs141817233	chr19	15840287	BRCA_P	UCA1	chr19:15939771-15947130	2.5606	8.07188e-08	0.00243035	0.435354	0.434113	1.9089e-05	AC004510.3	rs141817233
ENSG00000267308.1	chr19	15937855	15946663	19p13.12	rs5827310	chr19	15933767	BRCA_P	UCA1	chr19:15939771-15947130	2.31189	2.42156e-12	7.35231e-05	0.554182	0.553198	6.70305e-10	AC004510.3	rs5827310
ENSG00000267308.1	chr19	15937855	15946663	19p13.12	rs140063881	chr19	15848997	BRCA_P	UCA1	chr19:15939771-15947130	1.76154	3.39772e-20	3.91497e-09	0.684721	0.684014	1.17564e-17	AC004510.3	rs140063881
ENSG00000267308.1	chr19	15937855	15946663	19p13.12	rs111572945	chr19	15833384	BRCA_P	UCA1	chr19:15939771-15947130	1.76687	8.22703e-12	3.35562e-05	0.701919	0.701253	2.24782e-09	AC004510.3	rs111572945
ENSG00000267308.1	chr19	15937855	15946663	19p13.12	rs372834780	chr19	15923589	BRCA_P	UCA1	chr19:15939771-15947130	1.4266	2.88769e-06	0.000471016	0.693855	0.693183	0.000607971	AC004510.3	rs372834780
ENSG00000267308.1	chr19	15937855	15946663	19p13.12	rs7250010	chr19	15952475	BRCA_P	UCA1	chr19:15939771-15947130	1.69678	9.79337e-19	6.25175e-09	0.694064	0.69336	3.29408e-16	AC004510.3	rs7250010
ENSG00000267308.1	chr19	15937855	15946663	19p13.12	rs377450387	chr19	15841699	BRCA_P	UCA1	chr19:15939771-15947130	1.81848	1.71064e-22	1.04667e-09	0.686808	0.686123	6.39038e-20	AC004510.3	rs377450387
ENSG00000267308.1	chr19	15937855	15946663	19p13.12	rs138510193	chr19	15928869	BRCA_P	UCA1	chr19:15939771-15947130	1.94333	9.69938e-47	4.82724e-22	0.662123	0.661364	1.16983e-43	AC004510.3	rs138510193
ENSG00000267308.1	chr19	15937855	15946663	19p13.12	rs60183470	chr19	15920625	BRCA_P	UCA1	chr19:15939771-15947130	1.71214	1.56762e-13	3.33728e-06	0.699693	0.699027	4.42634e-11	AC004510.3	rs60183470
ENSG00000267308.1	chr19	15937855	15946663	19p13.12	rs75294014	chr19	15925453	BRCA_P	UCA1	chr19:15939771-15947130	2.00319	3.15583e-42	6.02885e-19	0.648339	0.647542	3.06246e-39	AC004510.3	rs75294014
ENSG00000267308.1	chr19	15937855	15946663	19p13.12	rs147726476	chr19	15896174	BRCA_P	UCA1	chr19:15939771-15947130	2.58303	6.73016e-08	0.00217499	0.421804	0.420539	1.60057e-05	AC004510.3	rs147726476
ENSG00000267308.1	chr19	15937855	15946663	19p13.12	rs76958841	chr19	15940619	BRCA_P	UCA1	chr19:15939771-15947130	2.00673	2.42567e-56	5.06283e-27	0.655351	0.654595	4.17939e-53	AC004510.3	rs76958841
ENSG00000267308.1	chr19	15937855	15946663	19p13.12	rs71178606	chr19	15966418	BRCA_P	UCA1	chr19:15939771-15947130	2.26003	1.10126e-14	7.70275e-06	0.557194	0.556195	3.19503e-12	AC004510.3	rs71178606
ENSG00000267308.1	chr19	15937855	15946663	19p13.12	rs35966143	chr19	15916662	BRCA_P	UCA1	chr19:15939771-15947130	1.71052	3.01229e-13	4.18247e-06	0.698355	0.697694	8.36566e-11	AC004510.3	rs35966143
ENSG00000267308.1	chr19	15937855	15946663	19p13.12	rs60563959	chr19	15921708	BRCA_P	UCA1	chr19:15939771-15947130	1.62934	2.18226e-09	0.000107843	0.705294	0.704645	5.56615e-07	AC004510.3	rs60563959
ENSG00000267308.1	chr19	15937855	15946663	19p13.12	rs144066565	chr19	15939648	BRCA_P	UCA1	chr19:15939771-15947130	2.01291	4.42712e-55	4.14898e-26	0.653901	0.653142	7.18778e-52	AC004510.3	rs144066565
ENSG00000267308.1	chr19	15937855	15946663	19p13.12	rs144762060	chr19	15914155	BRCA_P	UCA1	chr19:15939771-15947130	1.4048	1.80891e-06	0.000290895	0.693522	0.692852	0.000389589	AC004510.3	rs144762060
ENSG00000267308.1	chr19	15937855	15946663	19p13.12	rs143389756	chr19	15966592	BRCA_P	UCA1	chr19:15939771-15947130	2.3988	5.27282e-12	0.000131576	0.55829	0.557197	1.45478e-09	AC004510.3	rs143389756
ENSG00000267308.1	chr19	15937855	15946663	19p13.12	rs12986015	chr19	15804750	BRCA_P	UCA1	chr19:15939771-15947130	1.83358	3.54237e-09	0.000474262	0.691976	0.691287	8.90085e-07	AC004510.3	rs12986015
ENSG00000267308.1	chr19	15937855	15946663	19p13.12	rs3214194	chr19	15796801	BRCA_P	UCA1	chr19:15939771-15947130	1.77158	1.95388e-09	0.000263704	0.692235	0.69156	4.99874e-07	AC004510.3	rs3214194
ENSG00000267308.1	chr19	15937855	15946663	19p13.12	rs111497413	chr19	15913366	BRCA_P	UCA1	chr19:15939771-15947130	1.65923	7.57907e-14	1.83234e-06	0.708925	0.708239	2.16172e-11	AC004510.3	rs111497413
ENSG00000267308.1	chr19	15937855	15946663	19p13.12	rs147972650	chr19	15926910	BRCA_P	UCA1	chr19:15939771-15947130	1.33004	6.96971e-06	0.000237595	0.680079	0.679366	0.00137482	AC004510.3	rs147972650
ENSG00000267308.1	chr19	15937855	15946663	19p13.12	rs10558201	chr19	15803983	BRCA_P	UCA1	chr19:15939771-15947130	1.83069	2.84553e-09	0.000434403	0.690831	0.690151	7.21431e-07	AC004510.3	rs10558201
ENSG00000267308.1	chr19	15937855	15946663	19p13.12	rs201083376	chr19	15710287	BRCA_P	UCA1	chr19:15939771-15947130	2.48694	1.89337e-08	0.00150001	0.471101	0.469891	4.63331e-06	AC004510.3	rs201083376
ENSG00000267308.1	chr19	15937855	15946663	19p13.12	rs368682039	chr19	15840222	BRCA_P	UCA1	chr19:15939771-15947130	1.81848	1.71064e-22	1.04667e-09	0.686808	0.686123	6.39038e-20	AC004510.3	rs368682039
ENSG00000267308.1	chr19	15937855	15946663	19p13.12	rs149109868	chr19	15895893	BRCA_P	UCA1	chr19:15939771-15947130	1.37768	6.35513e-06	0.00043018	0.68849	0.687801	0.00125948	AC004510.3	rs149109868
ENSG00000267308.1	chr19	15937855	15946663	19p13.12	rs201934418	chr19	15889901	BRCA_P	UCA1	chr19:15939771-15947130	2.53399	6.88372e-08	0.00252352	0.474899	0.473666	1.63249e-05	AC004510.3	rs201934418
ENSG00000267308.1	chr19	15937855	15946663	19p13.12	rs12151252	chr19	15798039	BRCA_P	UCA1	chr19:15939771-15947130	1.89869	1.7671e-13	1.36622e-05	0.675447	0.674734	4.95645e-11	AC004510.3	rs12151252
ENSG00000267308.1	chr19	15937855	15946663	19p13.12	rs34777850	chr19	15958335	BRCA_P	UCA1	chr19:15939771-15947130	2.06024	5.0648e-11	0.000216911	0.649955	0.649143	1.36614e-08	AC004510.3	rs4572524
ENSG00000267308.1	chr19	15937855	15946663	19p13.12	rs2004064	chr19	15673511	BRCA_P	UCA1	chr19:15939771-15947130	1.43632	6.23024e-07	0.000160019	0.688374	0.687536	0.000137335	AC004510.3	rs2004064
ENSG00000270107.1	chr5	66475441	66476415	5q13.1	rs141272319	chr5	67300120	THCA	FCRLA	chr1:161676762-161684141	1.63897	2.99287e-06	2.1068e-06	0.498219	0.495806	0.069359	CTD-2306M10.1	rs141272319
ENSG00000270107.1	chr5	66475441	66476415	5q13.1	rs141272319	chr5	67300120	THCA	CD79A	chr19:42381190-42385439	2.34553	8.18736e-07	2.1068e-06	0.493156	0.490719	0.0241021	CTD-2306M10.1	rs141272319
ENSG00000270107.1	chr5	66475441	66476415	5q13.1	rs141272319	chr5	67300120	THCA	SPIB	chr19:50922195-50934570	1.44132	4.92246e-06	2.1068e-06	0.427904	0.425154	0.0974837	CTD-2306M10.1	rs141272319
ENSG00000272498.1	chr3	16380815	16381378	3p24.3	rs17042395	chr3	16593431	PRAD	IKZF3	chr17:37913968-38020441	1.48289	5.27202e-13	1.54402e-14	0.255078	0.252427	5.94054e-09	RP11-415F23.3	rs17042395
ENSG00000272498.1	chr3	16380815	16381378	3p24.3	rs17042395	chr3	16593431	PRAD	CCR4	chr3:32993066-32997841	0.992658	3.13981e-07	1.54402e-14	0.206314	0.20349	0.00203701	RP11-415F23.3	rs17042395
ENSG00000272761.1	chr3	112315641	112320749	3q13.2	rs1282984	chr3	111574137	BRCA_P	KERA	chr12:91444268-91451760	2.24672	0.000460277	0.0200398	0.256268	0.254611	0.0664072	RP11-572C15.6	rs1282984
